# Supplementary material for: Incorporation of Sb5+into CeO2: local structural distortion of the fluorite structure from a pentavalent substituent
Source: Royal Society of Chemistry journal article supplement (doi:10.1039/c8dt01750f), 2018-01-01
Supplement: c8dt01750f1.pdf [file c8dt01750f1.pdf]

**Electronic Supporting Information for**

**“Incorporation of  $\text{Sb}^{5+}$  into  $\text{CeO}_2$ : Local Structural Distortion of the Fluorite Structure From a Pentavalent Substituent”**

Craig I. Hiley, Janet M. Fisher, Reza J. Kashtiban, Giannantonio Cibir, David Thompsett and Richard I. Walton

**S1: Low magnification TEM images.**

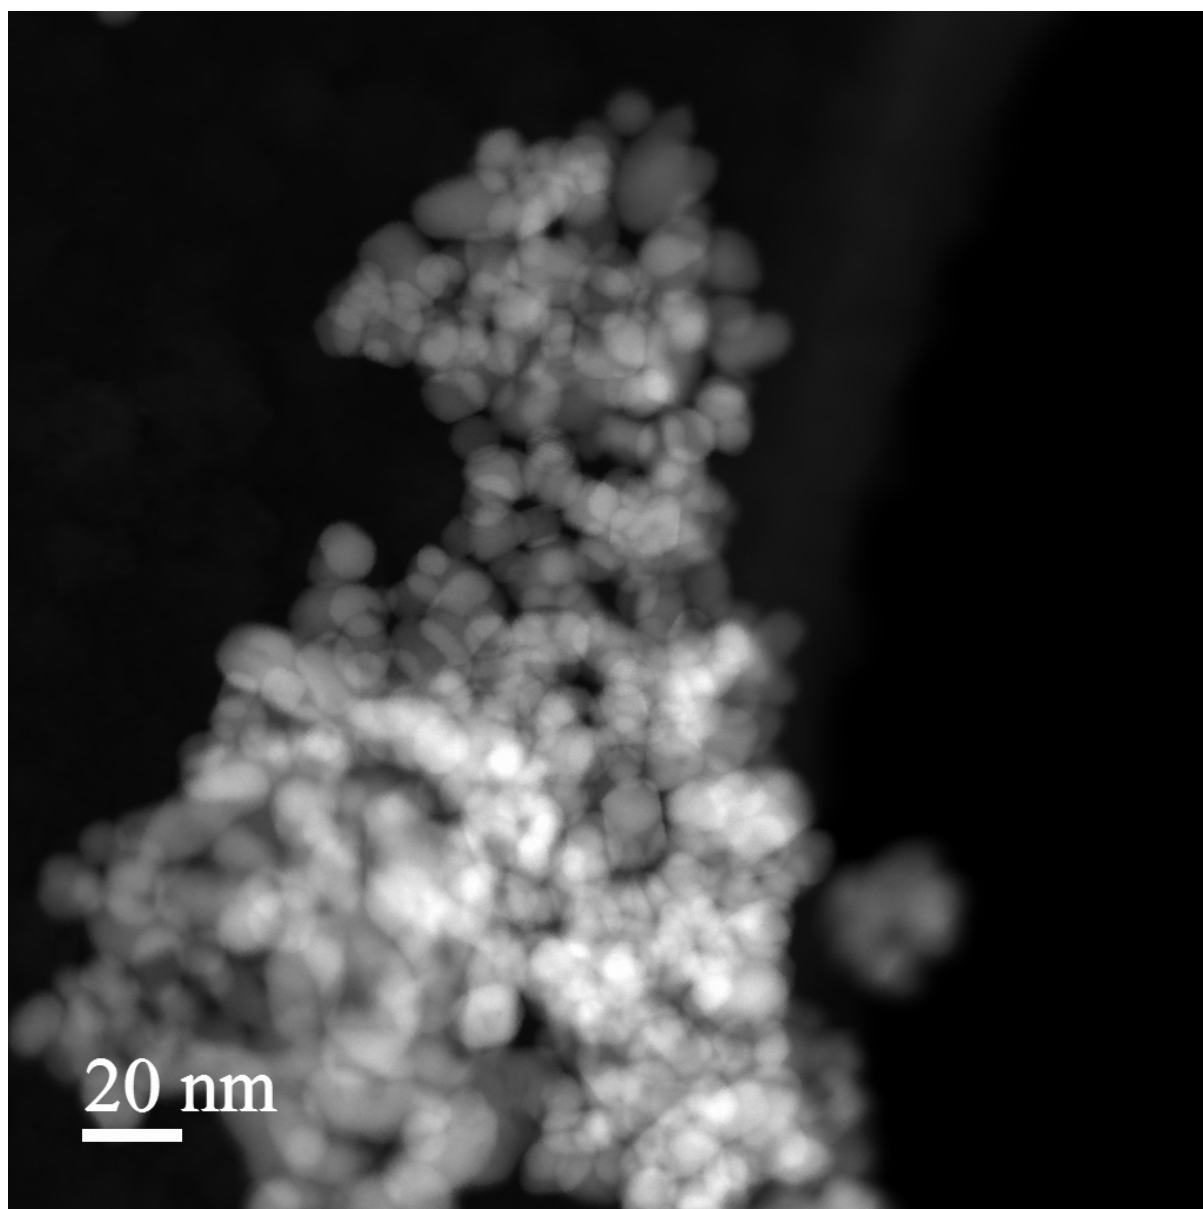

***Figure S1: ADF-STEM image of  $\text{CeO}_2$***

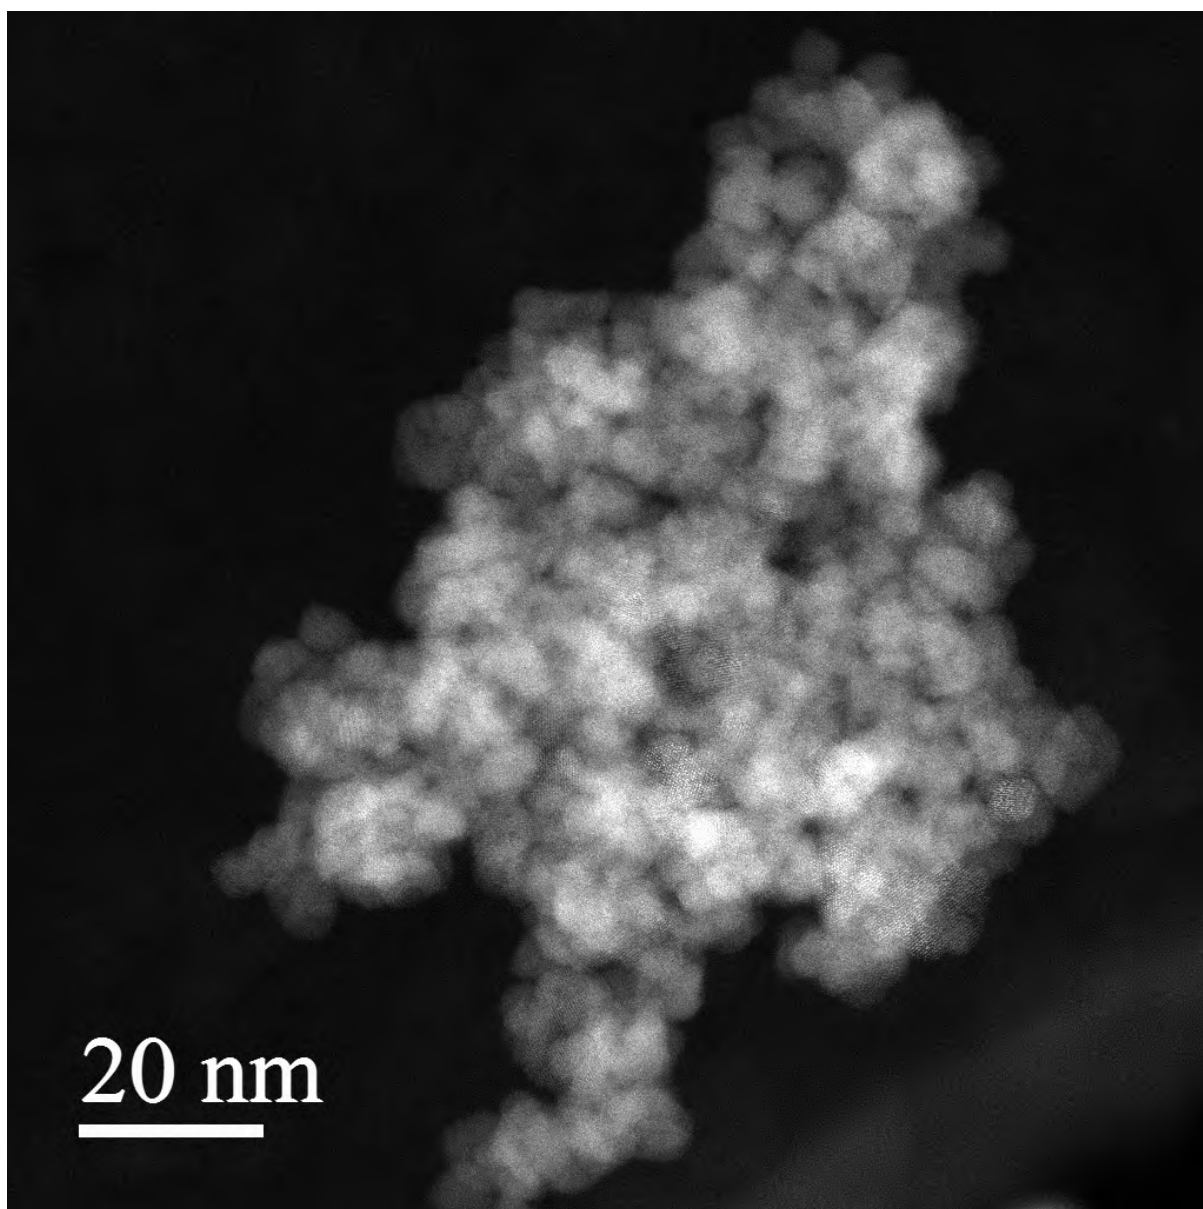

*Figure S2: ADF-STEM image of  $\text{Sb-CeO}_2$   $x = 0.05$  prepared from  $\text{SbCl}_5$*

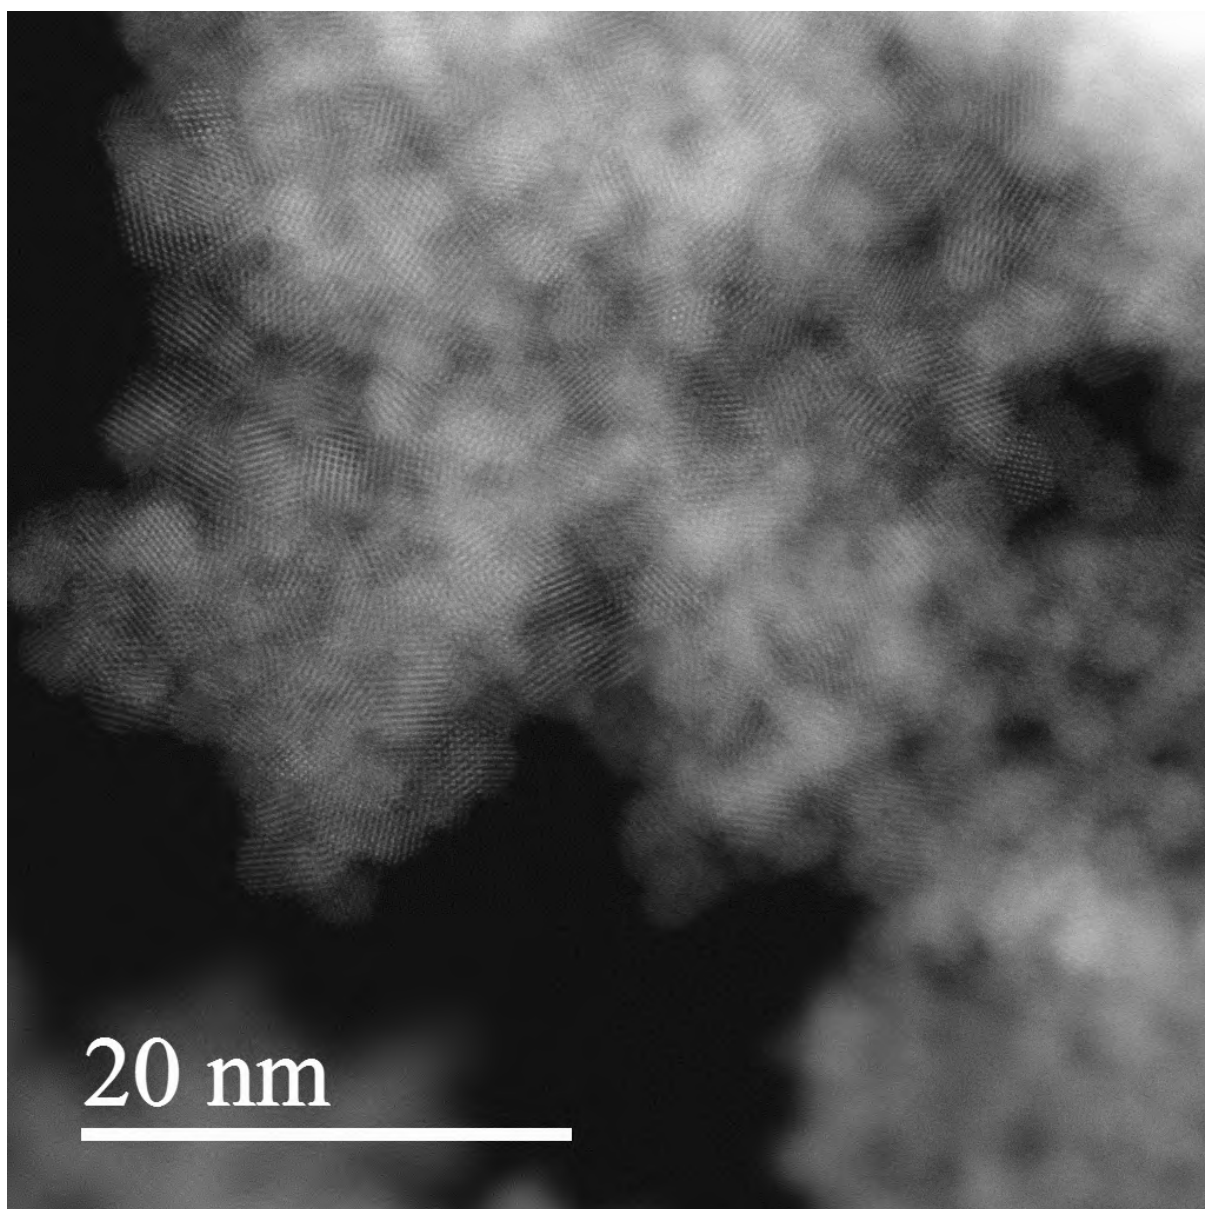

*Figure S3: ADF-STEM image of Sb-CeO<sub>2</sub>  $x = 0.3$  prepared from SbCl<sub>5</sub>*

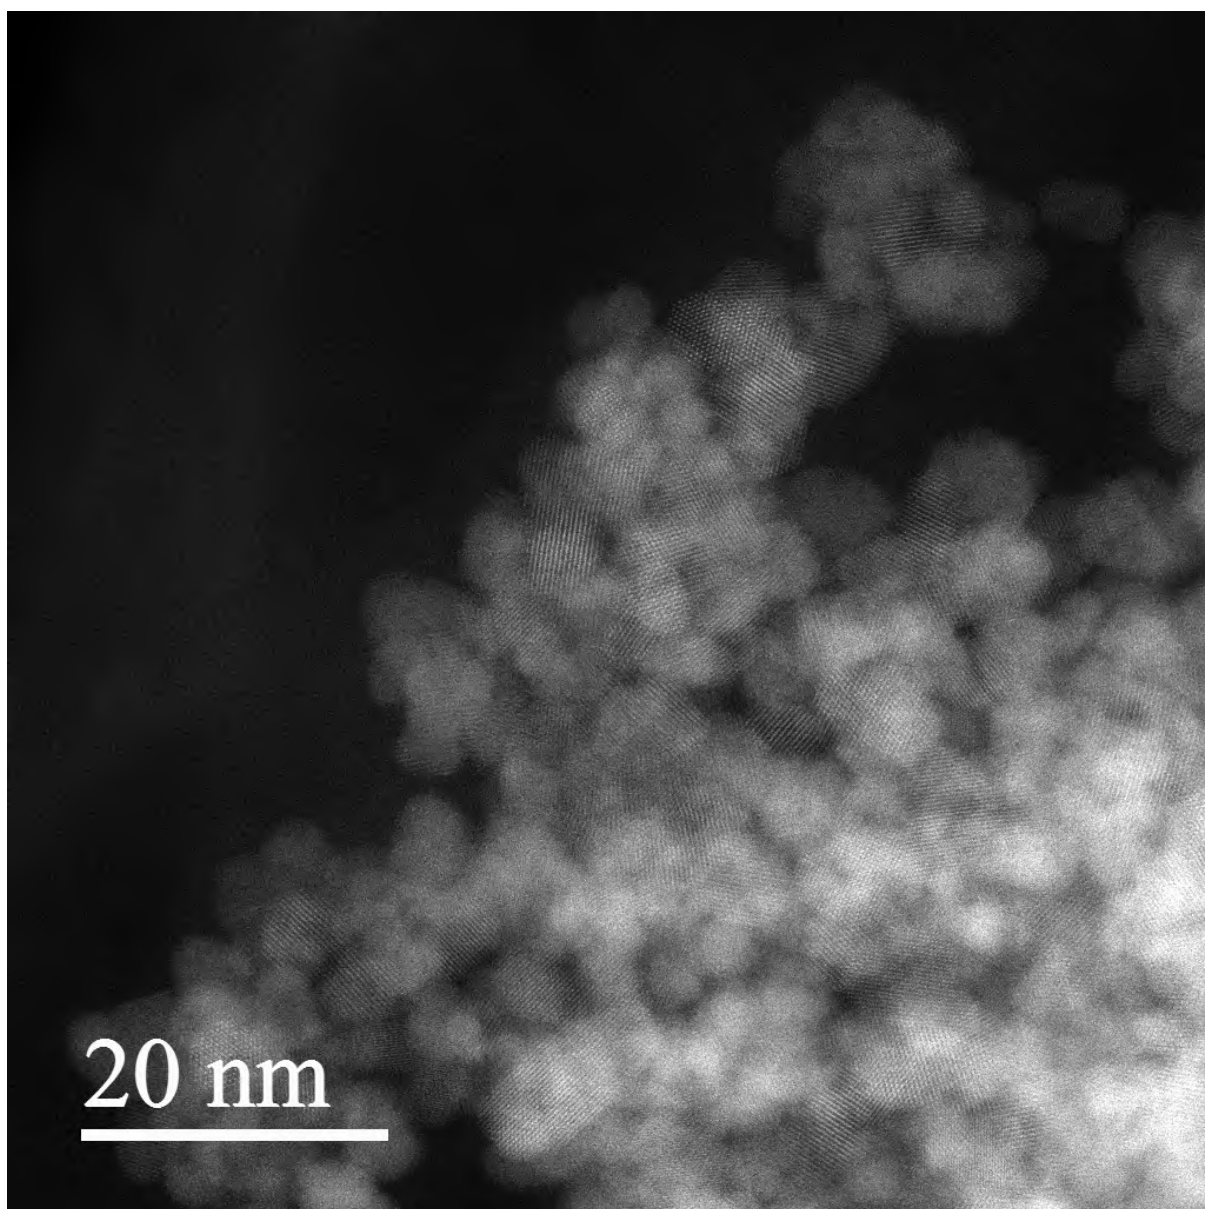

*Figure S4: ADF-STEM image of  $\text{Sb-CeO}_2$   $x = 0.05$  prepared from  $\text{SbCl}_3$*

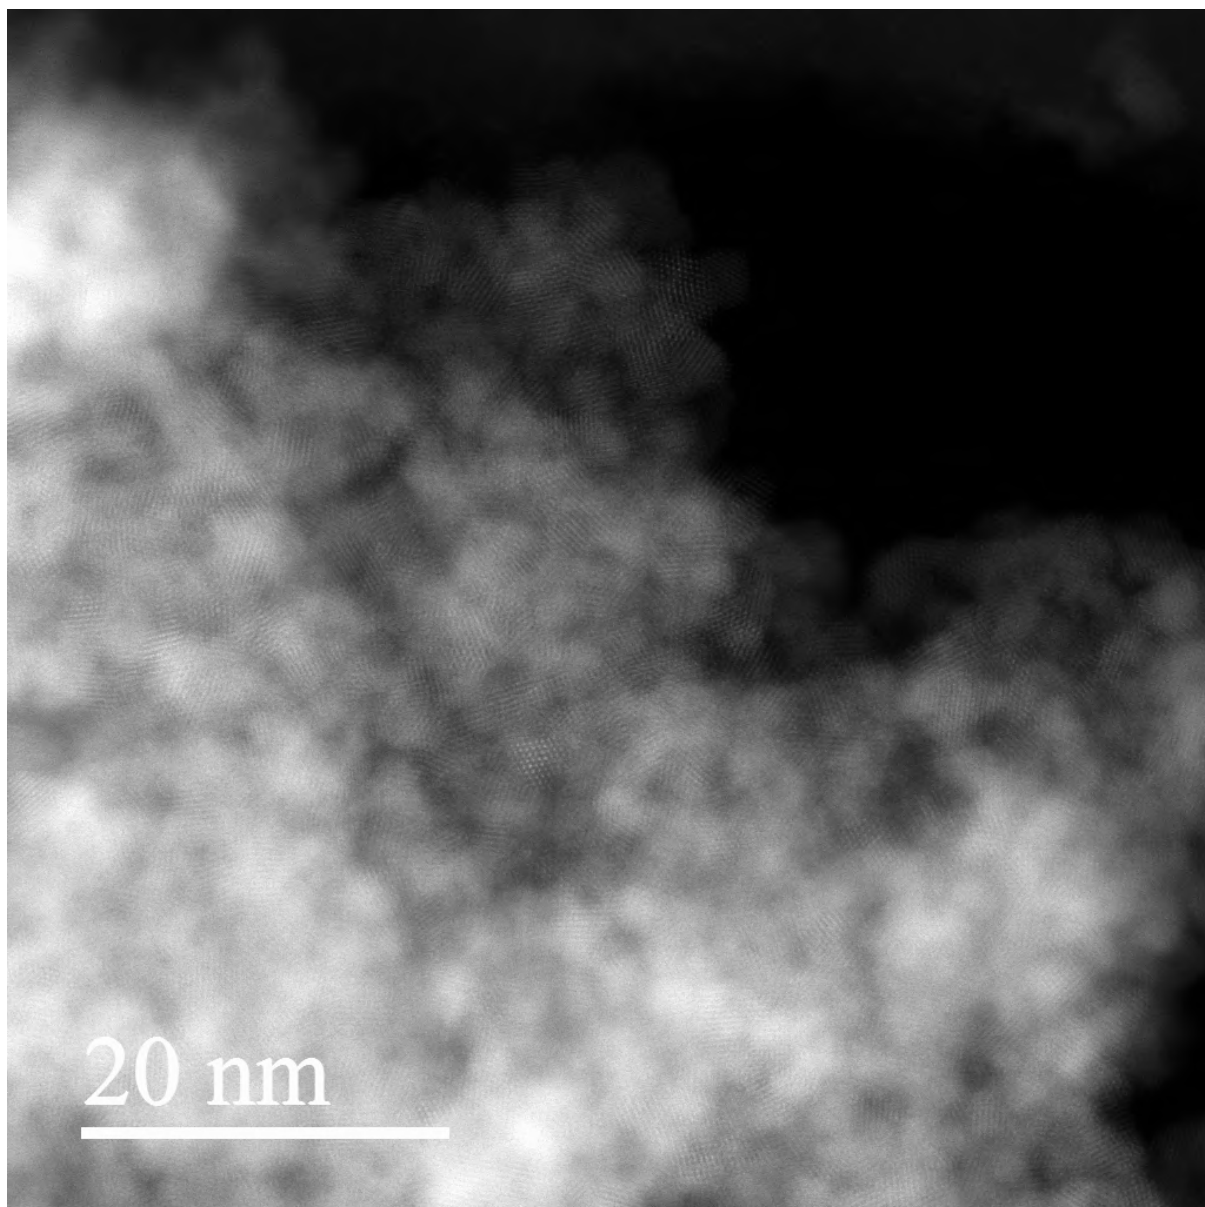

*Figure S5: ADF-STEM image of Sb-CeO<sub>2</sub>  $x = 0.3$  prepared from SbCl<sub>5</sub>*

**S2: EXAFS spectra and their Fourier transforms for Sb-substituted ceria materials.**

In each plot the points are the experimental data and the lines the fitted functions with the refined parameters reported in Table 2 of the main text.

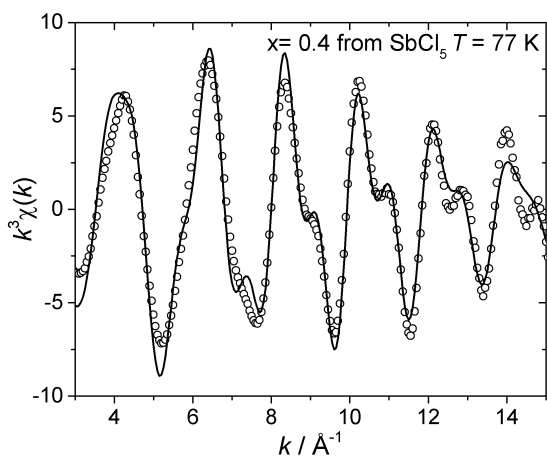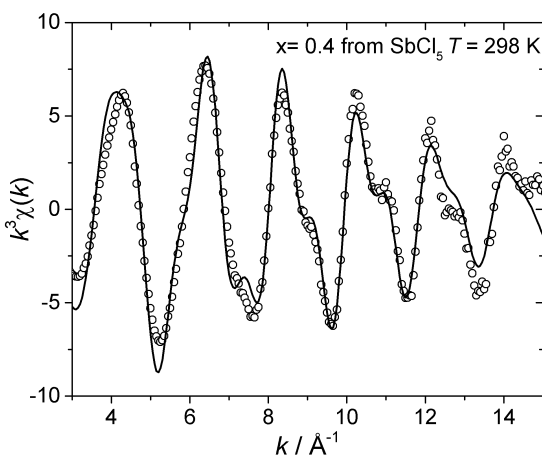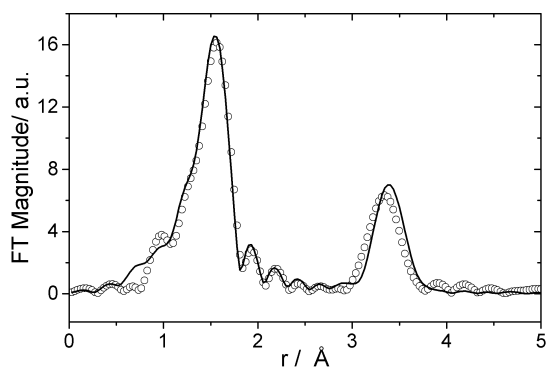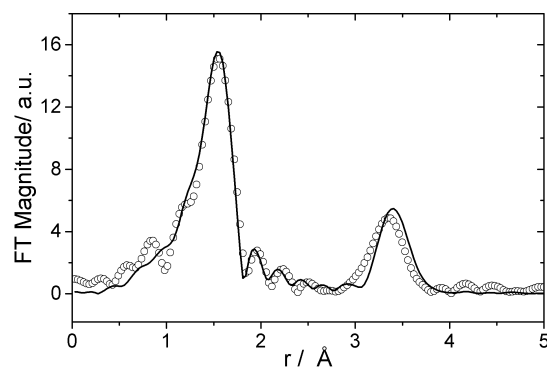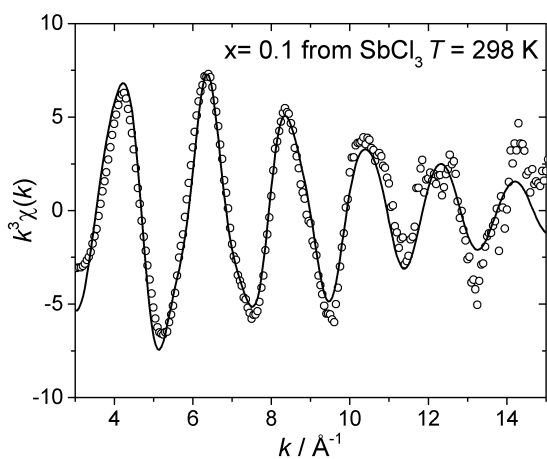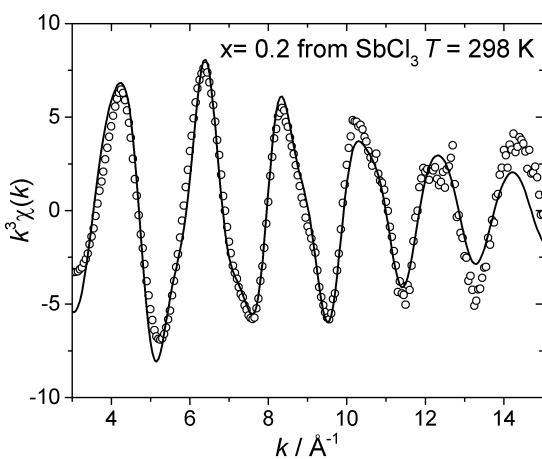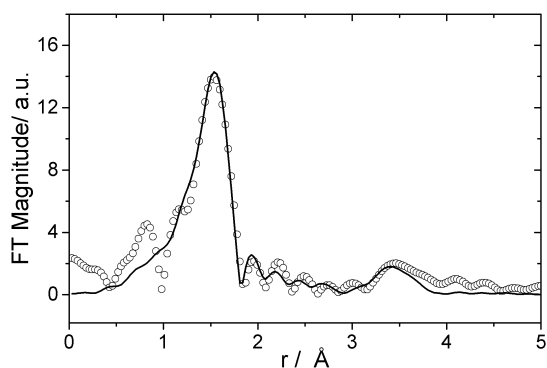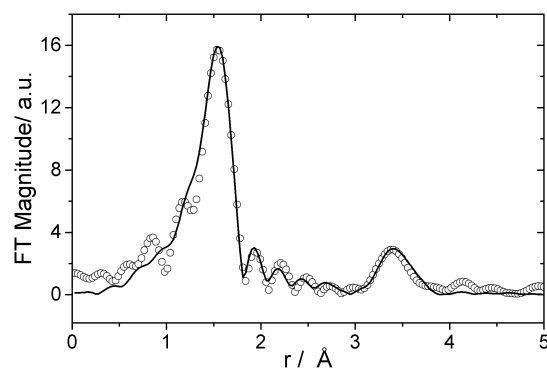

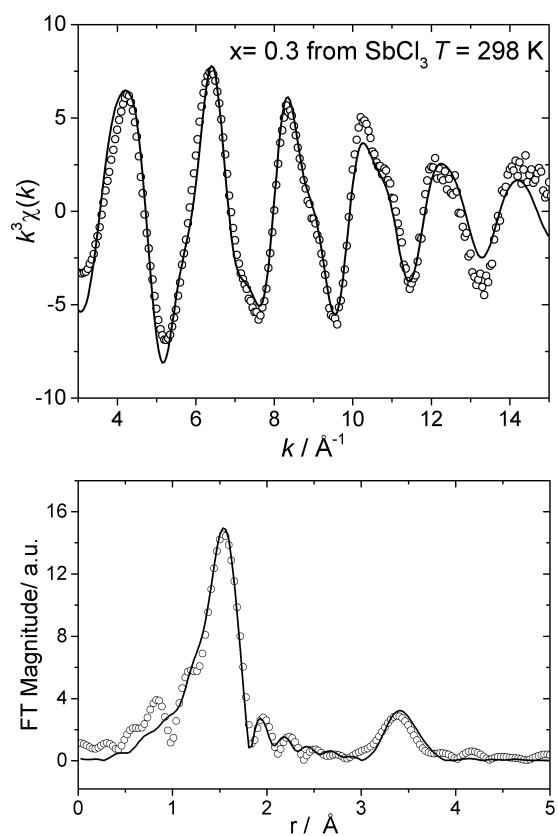

**Figure S6:** EXAFS fits (top  $k^3$ -weighted EXAFS and bottom their Fourier transform) from  $\text{Sb-CeO}_2$  materials reported in Table 2, main text. The data are the points and the fits are the lines (see Table 2 for refined parameters).
